# Supplementary material
Source: PubMed Central journal article supplement (PMC6895512)
Supplement: ajtr0011-7115-f5.pdf [file ajtr0011-7115-f5.pdf]

# Circular RNA and coronary artery disease

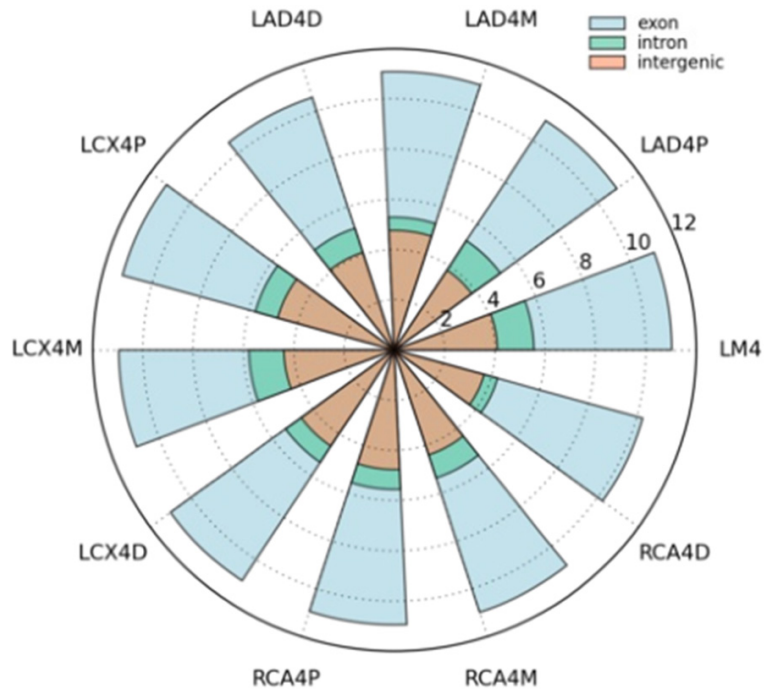

**Figure S1.** Distribution of three types of circRNAs in human coronary arteries.

# Circular RNA and coronary artery disease

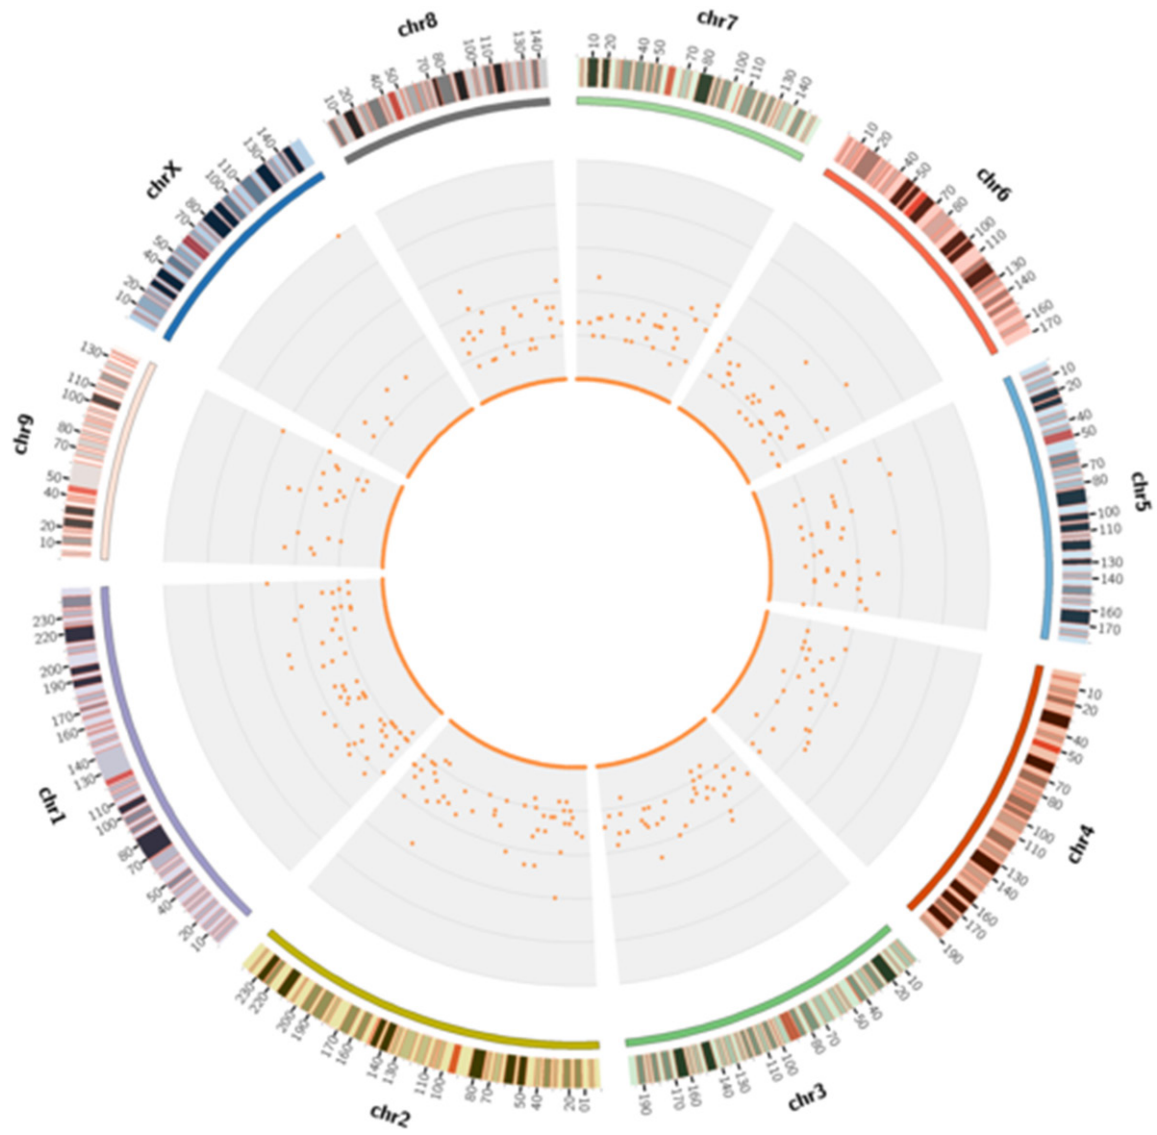

Figure S2. Distribution of circRNAs in human coronary arteries among human chromosomes.

# Circular RNA and coronary artery disease

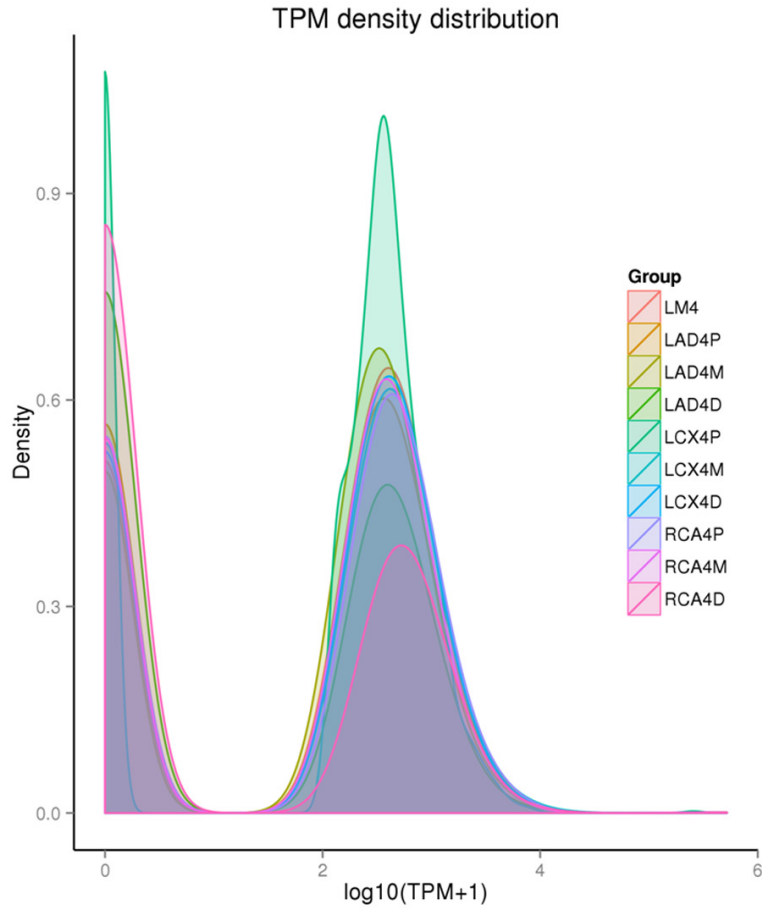

**Figure S3.** Transcript per million (TPM) density distribution of circRNAs in human coronary arteries.
